# Supplementary material for: Triglyceride-glucose index level and variability and outcomes in patients with acute coronary syndrome undergoing percutaneous coronary intervention: an observational cohort study
Source: PubMed Central journal article supplement (PMC9733246; doi:10.1186/s12944-022-01731-w), 2022-12-08
Supplement: 12944_2022_1731_MOESM1_ESM.pdf [file 12944_2022_1731_MOESM1_ESM.pdf]

20220820181416758430790014889984

1 **Background**

2 Acute coronary syndrome (ACS) as the most serious manifestation of coronary artery disease (CAD),  
3 remains a leading cause of mortality worldwide [1]. Patients with ACS are still at a heightened risk of  
4 cardiovascular events after percutaneous coronary intervention (PCI), despite using current guideline  
5 recommended or evidence-based strategies, such as newer generation drug-eluting stents, optimal  
6 antiplatelet therapy (ticagrelor or prasugrel), and intensified lipid-lowering medication [2-4]. Therefore,  
7 identification of residual risk factors for recurrent cardiovascular events is vital to improve clinical  
8 management.

9 Insulin resistance (IR) was reported to be closely associated with ACS onset and poor prognosis [5,6].  
10 It has been proven that triglyceride-glucose (TyG) index, calculated as  $\ln$  [fasting triglycerides (TGs) (mg/dL)  
11  $\times$  fasting plasma glucose (FPG) (mg/dL)/2], is a reliable and simple surrogate for IR and consistent with the  
12 standard measurement of IR [7-9]. Strong correlations have been demonstrated between TyG index and  
13 hypertension, vessel calcification, and subclinical CAD, ACS, and stroke [10-15]. Furthermore, it is recently  
14 suggested that TyG index can predict effectively poor outcomes for ACS patients with or without PCI  
15 [16,17]. However, these previous studies only assessed the prediction power of baseline TyG index, and did  
16 not determine the association between long-term exposure and variability in TyG index and adverse  
17 cardiovascular outcomes. Whether longitudinal patterns of TyG index, such as mean value or visit-to-visit  
18 variability, can provide better prognostic information than a single TyG index measurement has not  
19 specifically assessed. Therefore, the present study aimed to investigate the relationships between baseline  
20 and mean levels of TyG index and its variabilities and the incident cardiovascular and cerebrovascular events  
21 in ACS patients who underwent PCI and to determine which of these indices was superior for poor  
22 prognostication.

1 **Methods**

2 **Study population**

3 In the single-center retrospective study, a total of 5,277 ACS patients undergoing PCI were assessed from  
4 January 2017 to May 2019 at Beijing Anzhen Hospital, Capital Medical University, Beijing, China. Patients  
5 lacking at least three post-baseline TyG index measurements within 2 years after PCI ( $\geq 3$  months apart)  
6 ( $n=3467$ ), and those who had adverse cardiovascular event or died within 6 months after PCI ( $n=12$ ) were  
7 excluded. Patients with incomplete baseline data ( $n=56$ ) and those who missing follow-up data ( $n=48$ ) were  
8 also excluded. Finally, 1,694 participants were included in the present analysis (Figure 1). All procedures  
9 complied with the Declaration of Helsinki and were endorsed by the Ethics Committee and Independent  
10 Review Board of Beijing Anzhen Hospital. Informed consent was obtained from the patients before the index  
11 PCI.

12 **Data collection and definition**

13 Patients' medical records were reviewed for information on demographics and clinical characteristics,  
14 angiographic and procedural details, and laboratory data. Fasting venous blood samples were collected in  
15 the next day after the coronary procedure, and biological markers were analyzed in the core laboratory of  
16 Beijing Anzhen Hospital. The coronary angiogram and PCI were performed by experienced interventional  
17 cardiologists in accordance with current practice guidelines [18]. All patients received aspirin and ticagrelor  
18 for a minimum of 1 years after index PCI.

19 a previous diagnosis of hypertension, receiving antihypertensive agents, or systolic blood pressure  
20  $\geq 140$ mmHg and /or diastolic blood pressure  $\geq 90$ mmHg during the baseline hospitalization, were considered  
21 hypertensions. A history of diabetes mellitus, receiving glucose-lowering therapy, or HbA1c level  $\geq 6.5\%$   
22 during the baseline hospitalization were considered diabetes. Definite diagnosis of dyslipidemia, receiving

lipid-lowering agents, or <sup>5</sup> low-density lipoprotein cholesterol (LDL-C)  $\geq 1.8$  mmol/L, TG  $\geq 2.3$  mmol/L, or <sup>2</sup> high-density lipoprotein cholesterol (HDL-C)  $< 1.0$  mmol/L during the baseline hospitalization were <sup>3</sup> considered dyslipidemia.

#### <sup>1</sup> **Assessment of TyG index level and variability**

<sup>1</sup> The primary exposure variables were baseline level, mean level, and variability of TyG index. Mean TyG <sup>6</sup> index value and TyG index variability were evaluated utilizing fasting TG and FPG measurements beyond <sup>7</sup> 2 months after PCI, because fasting TG and FPG levels remained relatively stable after the initial decline. <sup>8</sup> Mean TyG index level was calculated based on the average value across all visits for each participant. TyG <sup>9</sup> index variability was assessed using the intra-individual standard deviation (SD) of TyG index values across <sup>10</sup> visits. Individual measurement numbers ranged as follows: 3 measurements (n = 922, 54.4%), 4 <sup>11</sup> measurement (n = 343, 20.2%) and  $\geq 5$  measurements (n = 429, 25.4%).

#### **Follow-up and endpoints**

<sup>4</sup> The primary outcome was major adverse cardiovascular and cerebrovascular events (MACCEs), defined as <sup>14</sup> a composite of all-cause death, nonfatal myocardial infarction (MI), unplanned revascularization, and <sup>15</sup> ischemic stroke. The secondary endpoints consisted of the individual components of the primary endpoint. <sup>21</sup> Deaths were considered cardiac unless a definitive non cardiac cause was found [19]. Nonfatal MI was <sup>17</sup> diagnosed using the Fourth Universal Definition of MI [20]. Ischemic stroke was diagnosed as a new <sup>18</sup> neurological deficit with sudden onset caused by an ischemic or hemorrhagic events, which lasted at least <sup>19</sup> 24 hours or lead to death [21]. Unplanned <sup>23</sup> revascularization was defined as any unexpected revascularization <sup>20</sup> of the target or nontarget coronary artery, including PCI or coronary artery bypass grafting (CABG) surgery <sup>21</sup> [19]. Each clinical event was adjudicated by at least two members of the individual clinical event committee. <sup>22</sup> Patients were scheduled for followed-up every 3 months until an endpoint occurred or the follow-up period

1 concluded (31, March 2021).

2 **7**  
**Statistical Analysis**

3 Continuous variables were expressed as mean±SD or medians (interquartile range [IQR]) as appropriate and

4 the comparison were examined using Student's t-test or the nonparametric Wilcoxon test. Categorical

5 variables were summarized as frequency (percentages) and analyzed with Chi-square or Fisher's exact test.

6 cumulative event curves of the primary endpoint were constructed by Kaplan–Meier approach, with log-

7 rank test for the differences among the tertile groups. The associations of three indices of TyG index with

8 the incident MACCEs were estimated using three multivariable Cox regression models. Hazard ratios (HRs)

9 were reported with 95% confidence intervals (CIs). Model 1 included no adjustments and Model 2 included

10 adjustments for sex and age. For baseline TyG index value, Model 3 included additional adjustments for

11 dyslipidemia, diabetes mellitus, hypertension, previous MI, previous PCI, previous CABG, mean stent

12 diameter, β-blocker, oral hypoglycemic agents, insulin, and baseline lipid profiles, and baseline HbA1c. For

13 mean level and variability in TyG index, Model 3 included additional adjustments for dyslipidemia, diabetes

14 mellitus, hypertension, previous MI, previous PCI, previous CABG, mean stent diameter, β-blockers, oral

15 hypoglycemic agents, insulin, baseline lipid profiles, baseline HbA1c, and baseline TyG index value.

16 Covariates were selected a priori as potentially as potential factors with clinical relevance. A trend test in

17 Model 3 using the tertiles as ordinal variables was also performed. Additionally, the predictive performance

18 of mean level and variability in TyG index on the secondary endpoints was assessed after adjustment for all

19 the variables in Model 3. The prognostic impact of mean level and variability in TyG index on the primary

20 endpoint were further explored in subgroups according to age, sex, body mass index (BMI), LDL-C, and

21 HbA1c. Pairwise comparisons of receiver-operating characteristic (ROC) curves were conducted to compare

22 the predictive capabilities of three indices of TyG index for MACCEs, with difference in the area under the

1 curves (AUCs) evaluated by Delong's test. Two-tailed  $P$  value < 0.05 was considered to indicate statistical  
2 significance. All data were analyzed using SPSS 25.0 (IBM Corp., Armonk, NY, USA) and Stata 14.0 (Stata  
3 Corp., College Station, TX, USA).

#### 4 **Results**

5 Of the final 1694 participants, the mean age was 57.8±9.7 years and 79.0% were male. The mean value of  
6 TyG index during follow-up was 8.73 (IQR 8.42-9.05), and the SD of which was 0.20 (IQR 0.12–0.29).  
7 During the median follow-up of 31 months, 7 (0.4%) all-cause death (5 from cardiovascular diseases [CVD]),  
8 17 (1.0%) non-fatal MI, 82 (4.8%) unplanned revascularization, and 5 (0.3%) ischemic strokes occurred.  
9 The primary endpoint event MACCEs occurred in 100 (5.9%) participants.

#### 10 **Baseline characteristics**

11 **Table 1** summarizes the baseline characteristics according to the occurrence of MACCEs. Patients who  
12 experienced MACCEs had higher prevalences of previous MI, previous PCI, previous CABG, and diabetes  
13 mellitus, exhibited much higher baseline FPG, baseline HbA1c, mean TyG index value and TyG index–SD;  
14 and were more likely to be prescribed glucose-lowering drugs than who did not experience MACCEs. The  
15 baseline characteristics stratified by mean TyG index value and TyG index–SD are presented in **Table S1**  
16 and **Table S2**, respectively.

#### 17 **Clinical outcomes**

18 The log-rank test findings were significant for MACCEs across the tertiles of all indices of TyG index in the  
19 Kaplan–Meier estimate analyses (**Figure 2**). **Table 2** shows the associations between three indices of TyG  
20 index and the incidence of MACCEs in the different models. In unadjusted analyses, the rate of MACCEs  
21 was significantly higher in the highest baseline TyG index tertile versus the lowest one (HR, 1.86; 95%CI  
22 1.13–3.06). After multivariable adjustment (Model 2 or Model 3), differences in MACCEs rates remained

1 statistically significant between the highest tertile and the lowest tertile. Similar findings were observed  
2 when <sup>1</sup> mean TyG index value and TyG index–SD were included in these models. After adjustment for  
3 variables in Model 3, the highest <sup>1</sup> tertiles of mean level and variability of TyG index demonstrated 1.72- and  
4 1.17-fold increased risks of MACCEs versus the lowest tertile, respectively. Moreover, there were stepwise  
5 increasing trends in the risk of MACCEs with increasing tertiles of baseline level (<sup>8</sup>  $P = 0.027$ ), mean level  
6 ( $P < 0.001$ ), and variability ( $P = 0.003$ ) of TyG index (**Figure 3**)

7 For the secondary endpoints, <sup>26</sup> the risk of unplanned revascularization was significantly higher in the  
8 highest baseline TyG index tertile compared with the lowest tertile (<sup>17</sup> HR 2.97 95% CI 1.64-5.38;  $P < 0.001$ ),  
9 but other cardiovascular events were not statistically significant among these tertiles. Positive <sup>3</sup> associations  
10 were observed between TyG index–SD and the risks of non-fatal MI and unplanned repeat revascularization,  
11 but other events did not differ significantly among these tertiles (**Table S3**).

12 <sup>1</sup> The impact of TyG index level and variability on the primary outcome were analyzed across subgroups  
13 of age, sex, BMI, baseline LDL-C and baseline HbA1c (**Figure S1 and Figure S2**). A significant association  
14 between mean TyG index value or TyG index–SD and MACCE was detected in males or patients with  
15 BMI  $\leq 25$  kg/m<sup>2</sup> or LDL-C  $> 70$  mg/dL. The risk of MACCEs increased with mean TyG index level in patients  
16 over 65 years, as well as the tertiles of TyG index–SD in those under 65 years. MACCEs increased  
17 substantially with increasing mean level of TyG index regardless of baseline HbA1c, but the positive impact  
18 of TyG index variability for MACCEs was not observed in patients with HbA1c  $\leq 6.5\%$ . A significant  
19 interaction did not exist between both mean value and variability of TyG index and these subgroups.

20 ROC curves for three indices of TyG index related to MACCE are shown in **Figure 4**. Mean TyG index  
21 level showed the strongest risk prediction for MACCE than baseline level of and variability in TyG index  
22 (AUCs 0.618 vs 0.566 vs 0.566). There was no significant difference in AUCs between baseline level of

1 TyG index and TyG index–SD (AUCs 0.566 vs 0.566,  $P = 0.996$ ). No significant incremental effect on the  
2 prediction of MACCE after adding TyG index–SD to mean TyG index value was observed (AUCs 0.621 vs  
3 0.618,  $P = 0.545$ ).

#### 4 **Discussion**

5 The present study demonstrated the prognostic roles of <sup>1</sup>baseline and mean TyG index level and variability  
6 in TyG index in ACS patients undergoing PCI. The major findings were that 1) the incidence of MACCEs  
7 increased with increasing baseline or mean level of TyG index even after adjustment for potential  
8 confounding factors; 2) similar observations were noted <sup>25</sup>for the relationship of TyG index variability with  
9 cardiovascular outcomes; and 3) mean TyG index value showed the most powerful ability to predict risk of  
10 MACCEs.

#### 11 **TyG index level and cardiovascular outcomes**

12 It has been proven that TyG index have a good concordance with <sup>33</sup>the gold standard test for IR, and even  
13 outperforms the homeostasis model assessment of IR and other alternative indicators (total cholesterol  
14 /HDL-C, visceral adiposity index, and apolipoprotein B/apolipoprotein A1) [8,9,22]. There has been some  
15 evidence that TyG index is highly related with CVD risk factors, and is valuable for early detection of  
16 patients vulnerable to developing CVD [13,14,23]. Recently, baseline TyG index level showed strong  
17 predictability for CAD prognosis. A retrospective cohort study on 3,181 patients with acute MI demonstrated  
18 that the risk of MACCEs was 19% higher in those with a high TyG index value (HR 1.19 <sup>28</sup>95% CI 1.01–1.41,  
19  $P = 0.046$ ) [24]. Luo et al. [25] observed that the incidence of MACCEs at 1 year after PCI in a STEMI  
20 population was 1.53-fold higher in the highest TyG index quartile than the lowest one. Two further cohort  
21 studies revealed a strong <sup>10</sup>correlation between increased TyG index and poor prognosis in ACS patients who  
22 underwent PCI and had diabetes mellitus [17,26]. However, these previous studies only measured TyG index



1 at baseline. TyG index is calculated by the fasting FPG and TG levels, both of which vary over time.  
2 Consequently, a baseline TyG index measurement does not necessarily reflect the body state has experienced  
3 a high TyG index over long periods of follow-up. Therefore, assessment at multiple time points can  
4 characterize the long-term longitudinal pattern of TyG index and may be more reliable and useful  
5 prognostically than a single TyG index measurement. The present study evaluated the impact of mean TyG  
6 index level over time on the incident MACCEs in ACS patients with PCI for the first time. The findings  
7 provide support for the existing results showing that, in addition to a high baseline TyG index, a high mean  
8 level during long-term follow-up, can predict future cardiovascular events in ACS population. Moreover,  
9 mean TyG index showed a better predictive ability than baseline TyG index, even other conventional risk  
10 factors being adjusted.

11 Biological plausibility has been suggested for a relationship between TyG index and MACCEs. First,  
12 TyG index reflect comprehensively the extent of IR, which have been shown to cause endothelial  
13 dysfunction, oxidative stress, and inflammatory response, all of which are important pathogenic factors  
14 contributing to the worse prognosis of CVD [27-29]. Second, there was a strong correlation between TyG  
15 index and metabolic disorders, such as higher BMI, LDL-C, TG, and FPG levels, which may contribute to  
16 the occurrence of adverse cardiovascular outcomes [26,30]. Third, several studies have demonstrated the  
17 impact of TyG index on macro- and microvascular damage, arterial stiffness and coronary artery  
18 calcification, which have been recognized major risk factors of CVD [31-34]. More efforts are still required  
19 to better interpret the mechanism underlying the finding.

#### 20 **TyG index variability and cardiovascular outcomes**

21 Recently, visit-to-visit variability in cardiovascular biological measurements, including lipids,  
22 glycemic parameters, and blood pressure, has sparked interest as potential predictors for cardiovascular

1 events [35-37]. a post-hoc analysis using data collected in <sup>13</sup> the Treating to New Target (TNT) trial showed  
2 that the incidences of <sup>13</sup> any cardiovascular event and coronary event both significantly increased with  
3 increasing LDL-C variability in CAD patients <sup>9</sup> (HR 1.11 95% CI 1.07-1.15,  $P < 0.0001$  and HR 1.16 95%  
4 CI 1.10-1.23,  $P < 0.0001$ ) [35]. A prospective cohort study further suggested that in patients with diabetes,  
5 high HbA1c variability predicted a higher rate of in-stent restenosis (HR 3.00 95% CI 1.14-7.92) [36]. A  
6 patient-level analysis from seven randomized clinical trials revealed that among patients with CAD,  
7 MACCEs were associated with greater blood pressure variability [37]. However, <sup>10</sup> the predictive significance  
8 of long-term TyG index variability for cardiovascular outcomes has not been fully clarified. The Kailuan  
9 cohort, comprising 62,443 Chinese CVD-free patients, demonstrated that individuals with a higher change  
10 in TyG index were more prone to developing CVD [38]. For the first time, the prognostic impact of  
11 variability in TyG index on ACS patients undergoing PCI was investigated in the present study. The results  
12 revealed a higher risk of MACCEs with higher TyG index variability, with a 2.73-fold greater risk in the  
13 highest tertile than the lowest one. According to these data, less TyG index variability is also important in  
14 addition to TyG index level itself.

15 The mechanisms linking TyG index variability and MACCEs in ACS patients remain unknown, but  
16 there are several potential explanations. First, TyG index was calculated by TGs and FPG, both of which  
17 change over time. It has been shown that glycemic fluctuations increased oxidative stress, inflammatory  
18 cytokines, endothelial dysfunction and sympathetic overactivation, the aforementioned relationships might  
19 partly explain the potential correlation between TyG index variability and cardiovascular events [39-41].  
20 Second, it is possible that TyG index variability can reflect other pathological conditions associated with  
21 increased variability of multiple biological parameters that increase cardiovascular risks. Third, individuals  
22 with a higher variability of IR are more likely to suffer from hypertension and diabetes mellitus, all linked

1 to cardiovascular events [42,43]. An in-depth study of the mechanism behind the relationship is warranted.

2 Taking intervention of TyG index may be beneficial in the long-term management of CAD due to its  
3 poor prognostic role in patients with CAD. There is, however, a relative lack of clear evidence in this regard.

4 A previous study showed that the insulin sensitizing agent pioglitazone significantly reduced the incidence  
5 of recurrent CVD in patients with diabetes mellitus, partly mediated by increased IR [44]. The new

6 hypoglycemic agents Sodium-glucose cotransporter-2 (SGLT-2) inhibitors have been proven to improve  
7 poor cardiovascular outcomes, one of possible reasons being the improvement in IR [45,46]. A randomized,

8 double-blind trial, enrolling 40 patients with prediabetes, showed that an 8-week treatment with  
9 empagliflozin was able to restore brain insulin sensitivity compared with placebo, which may contribute to

10 the beneficial effects of SGLT-2 inhibitors [47]. Further specific-designed investigation is required to  
11 determine whether TyG index medication improves clinical prognosis.

## 12 **2 Comparisons with other studies and what does the current work add to the existing knowledge**

13 Previous studies only explored the impact of baseline TyG index on worse prognosis in ACS patients with  
14 PCI. The present study further demonstrated the prognostic value of mean level and variability of TyG index  
15 for poor cardiovascular outcomes, and compared the predictive abilities of the three indicators.

## 16 **31 Study strengths and limitations**

17 the present study has several strengths. For the first time, the study comprehensively investigated the  
18 association of three indices of TyG index (baseline level, mean level, and variability) across visits with  
19 clinical outcomes in ACS population, and determined the superiority among these factors for prediction of  
20 poor prognosis. poor prognostic prediction. Several limitations of the study also warrant further  
21 consideration. First, since this study was retrospective, some residual or unmeasured confounders may not  
22 have been excluded. The present findings require confirmation by larger prospective studies. Second, several

1 selection bias may exist, because only patients with least three postbaseline TyG index measurements within  
2 2 years after PCI were included and the frequency of the measurements varied among the patients. Third,  
3 the present results should be cautiously interpreted before generalizing to other racial/ethnic groups as  
4 differences in metabolic levels. Fourth, some information including hypoglycemic therapy or lipid-lowering  
5 agents during long-term follow-up, was unavailable, which may have affected <sup>11</sup> the prognostic significance  
6 of TyG index on cardiovascular outcomes.

### 7 **Conclusions**

8 In conclusion, high <sup>1</sup> baseline and mean level of TyG index, as well as high variability in TyG index were  
9 <sup>11</sup> independently associated with the incident MACCEs in ACS patients undergoing PCI. In particular, mean  
10 TyG index showed the strongest predictive potential for poor prognosis. Thus, in clinical practice, TyG index  
11 can be used <sup>34</sup> as a simple and reliable surrogate marker for IR to provide prognostic information for ACS  
12 patients following PCI. Furthermore, monitoring the longitudinal patterns of TyG index could better identify  
13 individuals susceptible to cardiovascular events.

14%

SIMILARITY INDEX

PRIMARY SOURCES

- 1 Haibin Li, Yingting Zuo, Frank Qian, Shuohua Chen, Xue Tian, Penglian Wang, Xia Li, Xiuhua Guo, Shouling Wu, Anxin Wang. "Triglyceride-glucose index variability and incident cardiovascular disease: a prospective cohort study", *Cardiovascular Diabetology*, 2022  
56 words — 2%  
Crossref
- 2 [www.researchsquare.com](http://www.researchsquare.com)  
Internet  
39 words — 1%
- 3 Anran Wang, Yapeng Li, Lue Zhou, Kai Liu et al. "Triglyceride-Glucose Index Is Related to Carotid Plaque and Its Stability in Nondiabetic Adults: A Cross-Sectional Study", *Frontiers in Neurology*, 2022  
26 words — 1%  
Crossref
- 4 [jgc301.com](http://jgc301.com)  
Internet  
22 words — 1%
- 5 [Www.hindawi.com](http://Www.hindawi.com)  
Internet  
20 words — 1%
- 6 [academic.oup.com](http://academic.oup.com)  
Internet  
20 words — 1%
- 7 [www.primescholars.com](http://www.primescholars.com)  
Internet  
20 words — 1%

- 
- 8 [www.science.gov](http://www.science.gov) Internet 20 words — 1%
- 
- 9 [www.ncbi.nlm.nih.gov](http://www.ncbi.nlm.nih.gov) Internet 19 words — 1%
- 
- 10 Qi Zhao, Ting-Yu Zhang, Yu-Jing Cheng, Yue Ma, Ying-Kai Xu, Jia-Qi Yang, Yujie Zhou. "Impacts of triglycerides-glucose index on prognosis of patients with type 2 diabetes mellitus and non-ST-segment elevation acute coronary syndrome: results from an observational cohort study in China", Research Square Platform LLC, 2020  
Crossref Posted Content 15 words — < 1%
- 
- 11 Su Zou, Yingjia Xu. "Association of the triglyceride-glucose index and major adverse cardiac and cerebrovascular events in female patients undergoing percutaneous coronary intervention with drug-eluting stents: A retrospective study", Diabetes Research and Clinical Practice, 2021  
Crossref 14 words — < 1%
- 
- 12 [m.scirp.org](http://m.scirp.org) Internet 14 words — < 1%
- 
- 13 Ito, Matthew K, Rebecca J Cheung, Eric K Gupta, Kimberly K Birtcher, Pang H Chong, Theresa M Bianco, and Barry E Bleske. "Key Articles, Guidelines, and Consensus Papers Relative to the Treatment of Dyslipidemias—2005", Pharmacotherapy The Journal of Human Pharmacology and Drug Therapy, 2006.  
Crossref 13 words — < 1%
- 
- 14 "Abstracts of 51st EASD Annual Meeting", Diabetologia, 2015  
Crossref 12 words — < 1%

|    |                                                                                                                                                                                                                                                                                                                                                             |                 |
|----|-------------------------------------------------------------------------------------------------------------------------------------------------------------------------------------------------------------------------------------------------------------------------------------------------------------------------------------------------------------|-----------------|
| 15 | <a href="http://579leader.com">579leader.com</a><br>Internet                                                                                                                                                                                                                                                                                                | 12 words — < 1% |
| 16 | <a href="http://bio-protocol.org">bio-protocol.org</a><br>Internet                                                                                                                                                                                                                                                                                          | 11 words — < 1% |
| 17 | <a href="http://repo.lib.tokushima-u.ac.jp">repo.lib.tokushima-u.ac.jp</a><br>Internet                                                                                                                                                                                                                                                                      | 11 words — < 1% |
| 18 | <a href="http://jeccr.biomedcentral.com">jeccr.biomedcentral.com</a><br>Internet                                                                                                                                                                                                                                                                            | 10 words — < 1% |
| 19 | <a href="http://pure.rug.nl">pure.rug.nl</a><br>Internet                                                                                                                                                                                                                                                                                                    | 10 words — < 1% |
| 20 | <a href="http://www.journalcra.com">www.journalcra.com</a><br>Internet                                                                                                                                                                                                                                                                                      | 10 words — < 1% |
| 21 | E. Romagnoli. "Euroscore as predictor of in-hospital mortality after percutaneous coronary intervention", Heart, 1/20/2008<br>Crossref                                                                                                                                                                                                                      | 9 words — < 1%  |
| 22 | Jieyun You, Liming Gao, Yunli Shen, Wei Guo, Xingxu Wang, Qing Wan, Xiaoyan Wang, Jian Wu, Qi Zhang. "Predictors and long-term prognosis of left ventricular aneurysm in patients with acute anterior myocardial infarction treated with primary percutaneous coronary intervention in the contemporary era", Journal of Thoracic Disease, 2021<br>Crossref | 9 words — < 1%  |
| 23 | <a href="http://www.jstage.jst.go.jp">www.jstage.jst.go.jp</a><br>Internet                                                                                                                                                                                                                                                                                  | 9 words — < 1%  |
| 24 | Bingjun Zhang, Lingling Liu, Hengfang Ruan, Qiang Zhu, Dafan Yu, Yu Yang, Zhengqi Lu. "Triglyceride-glucose index linked to hospital mortality in critically ill stroke                                                                                                                                                                                     | 8 words — < 1%  |

patients: an observational multicentre study on eICU database", Research Square, 2020

Crossref

25 Yongkang Su, Shuxia Wang, Jin Sun, Yan Zhang et al. "Triglyceride Glucose Index Associated With Arterial Stiffness in Chinese Community-Dwelling Elderly", *Frontiers in Cardiovascular Medicine*, 2021

8 words — < 1%

Crossref

26 Yueqiao Si, Wenjun Fan, Chao Han, Jingyi Liu, Lixian Sun. "Atherogenic Index of Plasma, Triglyceride-Glucose Index and Monocyte-to-Lymphocyte Ratio for Predicting Subclinical Coronary Artery Disease", Research Square Platform LLC, 2020

8 words — < 1%

Crossref Posted Content

27 [downloads.hindawi.com](https://downloads.hindawi.com)

Internet

8 words — < 1%

28 [library.unisel.edu.my](https://library.unisel.edu.my)

Internet

8 words — < 1%

29 [link.springer.com](https://link.springer.com)

Internet

8 words — < 1%

30 [mafiadoc.com](https://mafiadoc.com)

Internet

8 words — < 1%

31 [medinform.jmir.org](https://medinform.jmir.org)

Internet

8 words — < 1%

32 [raw.githubusercontent.com](https://raw.githubusercontent.com)

Internet

8 words — < 1%

33 Yue Zhang, Xiaosong Ding, Bing Hua, Qingbo Liu, Hui Gao, Hui Chen, Xue-Qiao Zhao, Weiping Li,

7 words — < 1%



Hongwei Li. "High triglyceride-glucose index is associated with adverse cardiovascular outcomes in patients with acute myocardial infarction", Research Square Platform LLC, 2020

Crossref Posted Content

---

34 Min Kyung Kim, Chul Woo Ahn, Shinae Kang, Ji Sun Nam, Kyung Rae Kim, Jong Suk Park. "Relationship between the triglyceride glucose index and coronary artery calcification in Korean adults", Cardiovascular Diabetology, 2017

6 words — < 1%

Crossref

---

35 Yang, M. S., J. A. Burr, and J. E. Mutchler. "The Prevalence of Sensory Deficits, Functional Limitations, and Disability Among Older Southeast Asians in the United States", Journal of Aging and Health, 2012.

6 words — < 1%

Crossref

---

EXCLUDE QUOTES OFF

EXCLUDE SOURCES OFF

EXCLUDE BIBLIOGRAPHY ON

EXCLUDE MATCHES OFF
