# Supplementary material for: Triglyceride-glucose index level and variability and outcomes in patients with acute coronary syndrome undergoing percutaneous coronary intervention: an observational cohort study
Source: PubMed Central journal article supplement (PMC9733246; doi:10.1186/s12944-022-01731-w), 2022-12-08
Supplement: 12944_2022_1731_MOESM2_ESM.pdf [file 12944_2022_1731_MOESM2_ESM.pdf]

# Certificate of Editing

Edited provisional title  
Triglyceride-glucose index level and variability and outcomes in  
patient with acute coronary syndrome undergoing percutaneous  
coronary intervention: an observational cohort study

Client name and institution  
Yue Wang, Xiaofan Wu, Beijing Anzhen Hospital, Capital Medical University

Date Completed  
2022-08-18

Identification code  
110196

Certificate issued by  
Koji Yamashita  
Managing Director and CEO

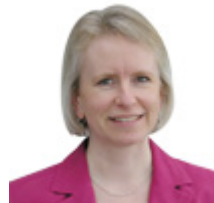

Expert Editor: Alison Sherwin  
1992 PhD Biochemistry  
University of Kent  
Biological Sciences, Medical and Health  
Sciences , Biochemistry and Cell Biology

[www.liwenbianji.cn](http://www.liwenbianji.cn)

While this certificate confirms the authors have used Edanz's editing services, we cannot guarantee that additional changes have not been made after our edits.
